# Supplementary material for: Impact of Protein Content on the Antioxidants, Anti-Inflammatory Properties and Glycemic Index of Wheat and Wheat Bran
Source: MDPI journal article supplement (doi:10.3390/foods11142049), 2022-07-11
Supplement: s1 [file s1]

**Table S1.** *m/z* values of phenolic compounds obtained in wheat samples by HPLC-ESI-QTOF-MS. Abbreviation: WB = wheat bran, WG = wheat grain, n.d. = not detected.

| Compound                                                | WB             |                 | WG             |                 |
|---------------------------------------------------------|----------------|-----------------|----------------|-----------------|
|                                                         | <i>m/z</i> exp | <i>m/z</i> calc | <i>m/z</i> exp | <i>m/z</i> calc |
| Protocatechuic acid                                     | 153.0205       | 153.0193        | 153.0200       | 153.0193        |
| Hydroxybenzoic acid                                     | 137.0254       | 137.0244        | 137.0250       | 137.0244        |
| Ferulic acid                                            | 193.0514       | 193.0506        | 193.0506       | 193.0506        |
| p-Coumaric acid                                         | 163.0386       | 163.0401        | n.d.           | n.d.            |
| Sinapic acid                                            | n.d.           | n.d.            | 223.0616       | 223.0612        |
| Diferulic isomer 1                                      | 385.0636       | 385.0929        | 385.0937       | 385.0929        |
| Diferulic isomer 2                                      | 385.0935       | 385.0929        | 385.0938       | 385.0929        |
| Diferulic isomer 3                                      | 385.0942       | 385.0929        | 385.0925       | 385.0929        |
| Diferulic isomer 4                                      | 385.0912       | 385.0929        | 385.0940       | 385.0929        |
| Diferulic isomer 5                                      | 385.0927       | 385.0929        | 385.0938       | 385.0929        |
| Diferulic isomer 6                                      | 385.0934       | 385.0929        | n.d.           | n.d.            |
| Caffeic acid                                            | 179.0354       | 179.0350        | 179.0360       | 179.0350        |
| Isoferulic acid                                         | 193.0498       | 193.0506        | 193.0508       | 193.0506        |
| 1-O-Sinapoyl-beta-D-glucose                             | 385.1159       | 385.114         | 385.1150       | 385.114         |
| Apigenin-6-C-arabinoside-8-C-hexoside I                 | 563.1396       | 563.1406        | 563.1401       | 563.1406        |
| Apigenin-6-C-arabinoside-8-C-hexoside II                | 563.1414       | 563.1406        | 563.1412       | 563.1406        |
| Apigenin-6-C-galactosyl-8-C-glucosyl-O-glucurpyranoside | 769.1792       | 769.1833        | n.d.           | n.d.            |
| Syringaresinol                                          | n.d.           | n.d.            | 417.1563       | 417.1555        |
| 4-Hydroxybenzaldehyde                                   | 121.0301       | 121.0295        | 121.0300       | 121.0295        |
| 5-Nonadecenylresorcinol                                 | 373.3137       | 373.3112        | n.d.           | n.d.            |
| 5-Nonadecylresorcinol                                   | 375.3285       | 375.3269        | 375.3280       | 375.3269        |
| 5-Heneicosylresorcinol                                  | 403.3593       | 403.3582        | 403.3599       | 403.3582        |
